# Supplementary material for: Preparation and characterization of colloidal copper xanthate nanoparticles
Source: Royal Society of Chemistry journal article supplement (doi:10.1039/c6nj00098c), 2016-01-01
Supplement: c6nj00098c1.pdf [file c6nj00098c1.pdf]

## Supplementary Information

### Preparation and characterization of colloidal copper xanthate nanoparticles

Yuri Mikhlin,<sup>a</sup> Sergey Vorobyev,<sup>a,b</sup> Svetlana Saikova,<sup>b</sup> Yevgeny Tomashevich,<sup>a</sup> Olga Fetisova,<sup>a</sup> Svetlana Kozlova<sup>a</sup> and Sergey Zharkov<sup>b,c</sup>

*Institute of Chemistry and Chemical Technology of the Siberian Branch of the Russian Academy of sciences, Akademgorodok, 50/24, Krasnoyarsk, 660036, Russia,*

*e-mail: [yumikh@icct.ru](mailto:yumikh@icct.ru) (Yuri Mikhlin)*

*Siberian Federal University, Svobodny pr. 79, Krasnoyarsk, 660041, Russia*

*Kirensky Institute of Physics of the Siberian Branch of the Russian Academy of sciences, Akademgorodok 50/38, Krasnoyarsk, 660036, Russia*

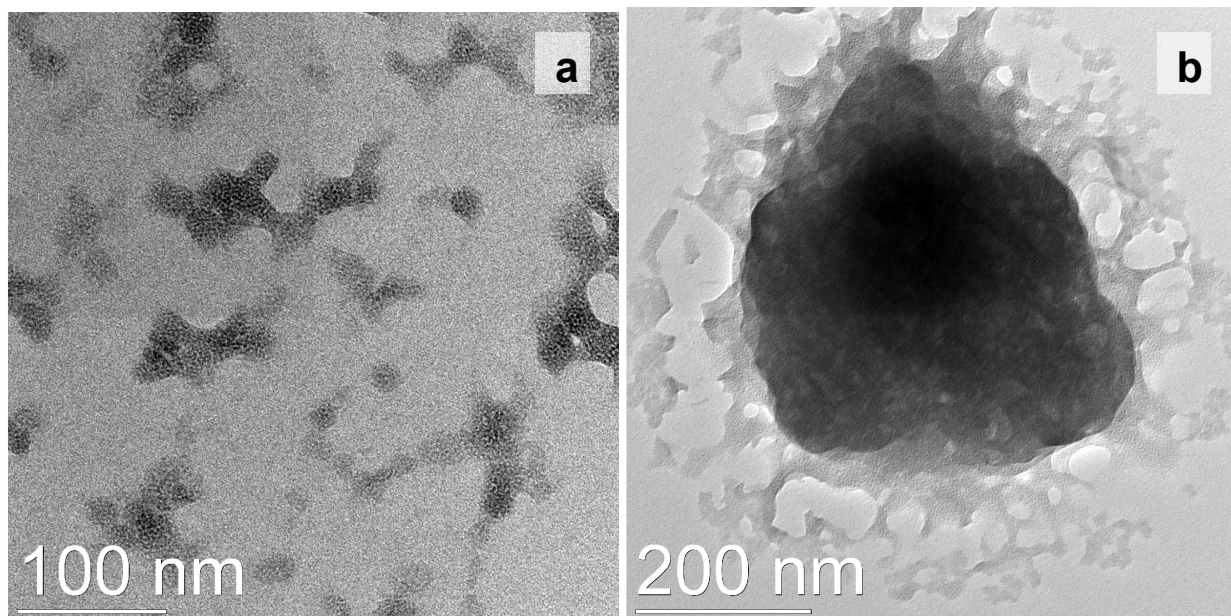

Fig. S1. TEM micrographs of copper i-butyl xanthate particles formed at xanthate to copper ratios of (a) 4 and (b) 2 at room temperature.

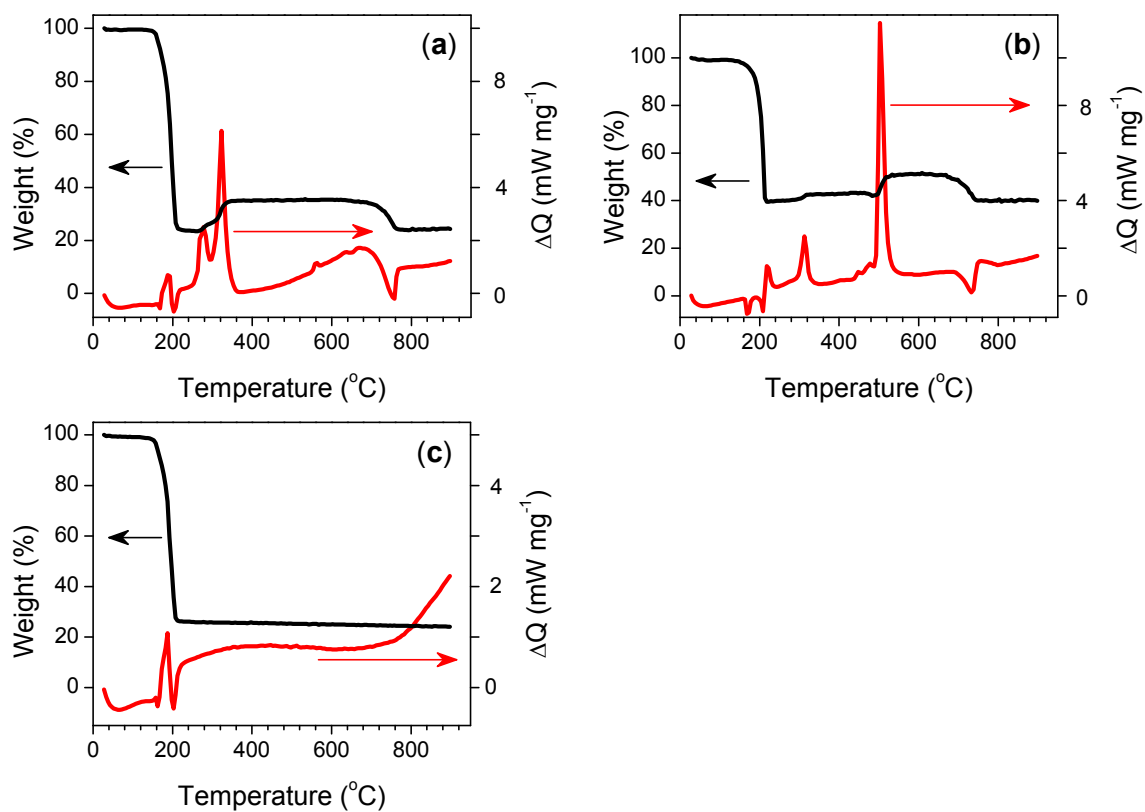

Fig. S2. TG and DTA curves for copper n-butyl xanthate measured (a) in air, (b) in air after dixanthogen extraction with acetone, (c) in Ar atmosphere.
